# Supplementary material for: Achieved excellent energy storage performance under moderate electric field in BaTiO3-modified Bi0.5Na0.5TiO3-based lead-free ceramics via multiple synergistic design
Source: Royal Society of Chemistry journal article supplement (doi:10.1039/d4tc03558e), 2024-10-31
Supplement: d4tc03558e1.pdf [file d4tc03558e1.pdf]

## Supporting Information

### **Achieved excellent energy storage performance under moderate electric field in BaTiO<sub>3</sub>-modified Bi<sub>0.5</sub>Na<sub>0.5</sub>TiO<sub>3</sub>-based lead-free ceramics via multiple synergistic design**

Xiangluo Miao,<sup>1</sup> Run Jing,<sup>1</sup> Zhenhui Zhang,<sup>1</sup> Xiangbin Zhang,<sup>1</sup> Shibang Zhang,<sup>1</sup> Pengfei Li,<sup>1</sup> Changan Wang,<sup>2,\*</sup> Chung Ming Leung,<sup>3</sup> Xingsen Gao,<sup>1</sup> and Min Zeng,<sup>1,\*</sup>

<sup>1</sup> *Guangdong Provincial Key Laboratory of Quantum Engineering and Quantum Materials, and Institute for Advanced Materials, South China Academy of Advanced Optoelectronics, South China Normal University, Guangzhou 510006, China*

<sup>2</sup> *Jinhua Advanced Research Institute, Jinhua, 321004, China*

<sup>3</sup> *School of Mechanical Engineering and Automation, Harbin Institute of Technology, Shenzhen, China*

---

\* Author to whom correspondence should be addressed. E-mails: [wangchangan@gdisit.com](mailto:wangchangan@gdisit.com) (C. A. Wang), [zengmin@scnu.edu.cn](mailto:zengmin@scnu.edu.cn) (M. Zeng)

## 1. The XRD refined results

Figure S1 and Table S1 display the XRD refined results and confidence factors of the BNBT- $x$ CHZ ceramics. It can be seen that the value of  $R_{wp}$  and  $R_p$  are both small, demonstrating that these results are credible.

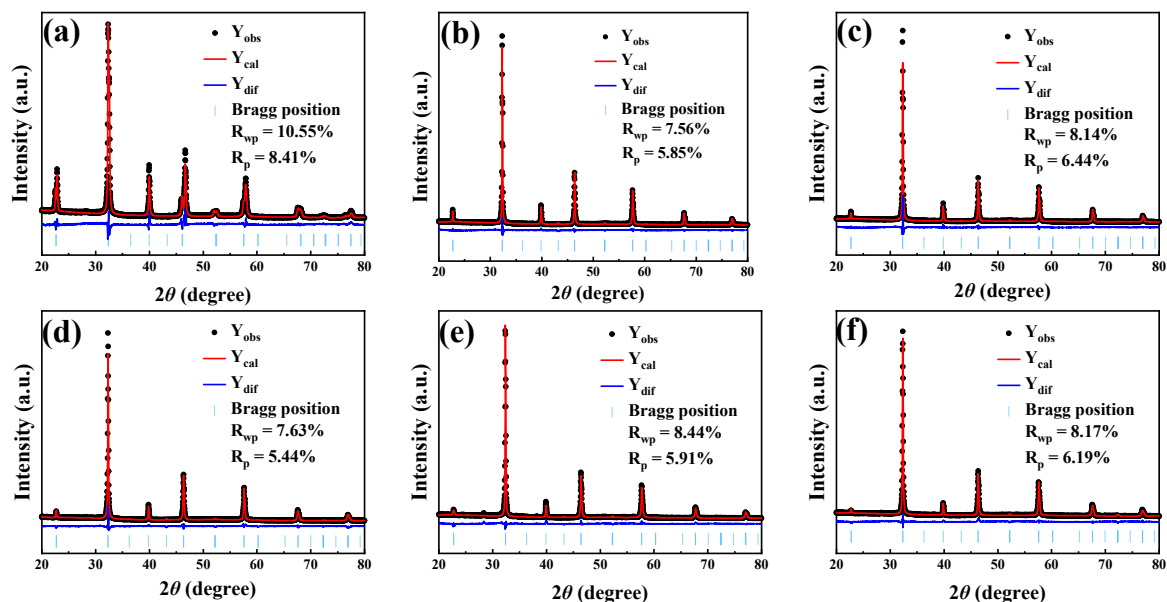

Figure S1. The Rietveld refinement results of the BNBT- $x$ CHZ ceramics: (a)  $x = 0.00$ ; (b)  $x = 0.10$ ; (c)  $x = 0.12$ ; (d)  $x = 0.14$ ; (e)  $x = 0.16$ ; (f)  $x = 0.18$ .

**Table S1.** The XRD refined results and confidence factors of all components

| Sample     | $a$ (Å) | $b$ (Å) | $c$ (Å) | $R_{wp}$ (%) | $R_p$ (%) |
|------------|---------|---------|---------|--------------|-----------|
| $x = 0.00$ | 5.53080 | 5.53080 | 3.91346 | 10.55        | 8.41      |
| $x = 0.10$ | 5.53205 | 5.53205 | 3.91429 | 7.56         | 5.85      |
| $x = 0.12$ | 5.53507 | 5.53507 | 3.91260 | 8.14         | 6.44      |
| $x = 0.14$ | 5.53811 | 5.53811 | 3.91879 | 7.63         | 5.44      |
| $x = 0.16$ | 5.53864 | 5.53864 | 3.89059 | 8.44         | 5.91      |
| $x = 0.18$ | 5.54196 | 5.54196 | 3.92050 | 8.17         | 6.19      |

## 2. Leakage current

Figure S2 shows the room-temperature leakage current density electric field ( $J$ - $E$ ) curves of the BNBT- $x$ CHZ ceramics at 120 kV/cm. It can be seen that all the ceramics exhibit relatively low leakage current density. Noting that the BNBT-0.14CHZ ceramics have the lowest leakage current density, which is consistent with the dense grain structure in Figure 3. It is recognized that the large leakage current is what causes the high electro-thermal breakdown and conduction loss in the conduction current. Consequently, the low  $J$  is conducive to improve BDS.

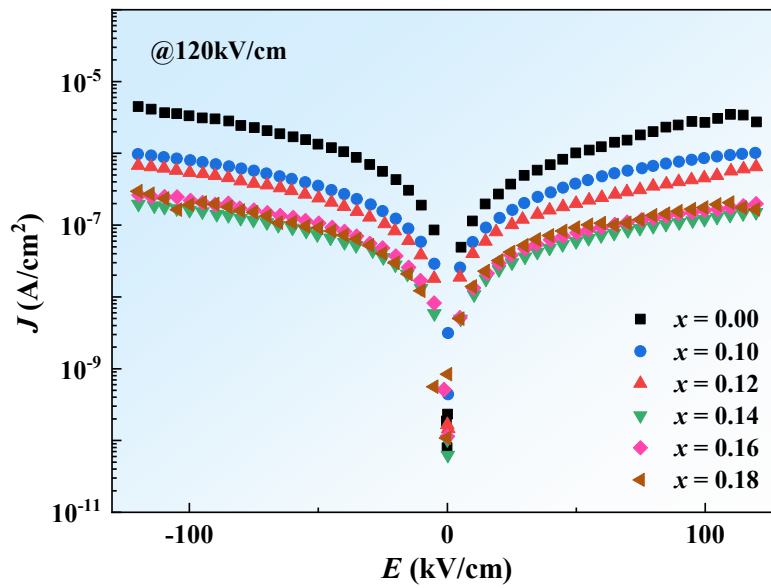

Figure S2. Room-temperature leakage current  $J$ - $E$  curves of the BNBT- $x$ CHZ ceramics at 120 kV/cm.

### 3. Complex impedance spectra

At 410 °C, Z-view software was used to fit the arcs of complex impedance, and the received parameters are listed in [Table S2](#).

**Table S2** R and CPE parameters (C, n) values of equivalent circuit model of BNBT-  
xCHZ ceramics

| <i>x</i> | R1 (Ω) | C1 (F)  | n1     | R2 (Ω) | C2 (F)  | n2     |
|----------|--------|---------|--------|--------|---------|--------|
| 0        | 608    | 3.32E-9 | 0.9537 | 602    | 1.13E-8 | 0.9604 |
| 0.1      | 1669   | 4.19E-9 | 0.8409 | 1736   | 9.65E-8 | 0.8612 |
| 0.12     | 2296   | 1.99E-8 | 0.9658 | 2295   | 1.99E-8 | 0.9658 |
| 0.14     | 3179   | 1.81E-8 | 0.9935 | 21172  | 1.55E-8 | 0.9580 |
| 0.16     | 2873   | 1.37E-9 | 0.9007 | 15305  | 1.59E-8 | 0.9277 |
| 0.18     | 2458   | 2.69E-8 | 0.9466 | 8462   | 1.68E-9 | 0.9990 |
